# Supplementary material for: Remarkable photocytotoxicity of a novel triazole-linked cationic porphyrin–β-carboline conjugate
Source: Royal Society of Chemistry journal article supplement (doi:10.1039/c2cc38018h), 2012-11-28
Supplement: c2cc38018h.pdf [file c2cc38018h.pdf]

## Supplementary Data

# Remarkable photocytotoxicity of a novel triazole–linked cationic porphyrin– $\beta$ –carboline conjugate

Dalip Kumar,<sup>\*a</sup> Bhupendra A Misha,<sup>a</sup> K. P. Chandra Shekar,<sup>a</sup> Anil Kumar,<sup>a</sup>  
Kanakan Akamatsu,<sup>b</sup> Eriko Kusaka,<sup>b</sup> Takeo Ito<sup>\*b</sup>

<sup>a</sup> *Department of Chemistry, Birla Institute of Technology and Science, Pilani 333 031; India*

<sup>b</sup> *Department of Energy and Hydrocarbon Chemistry, Graduate School of Engineering,  
Kyoto University, Kyoto 615-8510, Japan*

**\*Corresponding authors:**

**D. Kumar:** Department of Chemistry, Birla Institute of Technology and Science, Pilani

333031, Rajasthan, India; Tel.: +91–1596–245073–279; Fax: +91–1596–244183; E–mail

address: dalipk@bits–pilani.ac.in

**Takeo Ito:** Department of Energy and Hydrocarbon Chemistry, Graduate School of

Engineering, Kyoto University, Kyoto 615–8510, Japan; Tel.: +91–1596–245073–279;

Fax: +91–1596–244183; E–mail address: takeoit@scl.kyoto–u.ac.jp

## General Methods

All reactions were performed in oven-dried glass apparatus unless otherwise mentioned. Bulk grade hexanes, chloroform ( $\text{CHCl}_3$ ), methanol and ethyl acetate ( $\text{EtOAc}$ ) for chromatography were distilled prior to use. Tetrahydrofuran (THF), dimethylformamide (DMF), acetonitrile (MeCN) and diethyl ether ( $\text{Et}_2\text{O}$ ) were degassed with nitrogen and dried by passing through activated alumina. Triethylamine ( $\text{NEt}_3$ ), dichloromethane (DCM) and chloroform ( $\text{CHCl}_3$ ) were distilled from  $\text{CaH}_2$  under nitrogen before use. Acetone was distilled over potassium permanganate prior to use. All laboratory grade reagents were obtained commercially from Aldrich (India), S. D. Fine Chemicals, Pvt Ltd, India and Spectrochem, India. The reactions were monitored by thin layered chromatography using Merck pre-coated plates 60 F<sub>254</sub>. Developed TLC plates were visualized under UV light and/or appropriate strains (potassium permanganate, iodine vapors or sulphuric acid). Column chromatography was performed using silica-gel (100–200 or 230–400 mesh size) purchased from Merck. Fourier transform-infrared (FTIR) were performed on Shimadzu IRPrestige–21 spectrometer.  $^1\text{H}$  NMR spectra were recorded at Bruker Advance II 400 MHz spectrometer in  $\text{CDCl}_3$  using tetramethylsilane (TMS) as internal standard unless otherwise mentioned. Data are presented as follows: chemical shift, multiplicity (br = broad, s = singlet, d = doublet, t = triplet, q = quartet, m = multiplet), coupling constant ( $J$  in Hertz (Hz) and integration. Matrix-assisted laser desorption ionization–time of flight MS (MALDI–TOF MS) spectrometry was performed using 2,5-dihydroxybenzoic acid (DHB) as the matrix. Waters high performance liquid chromatography (HPLC) system with sunfire C18 column was used to ascertain purity of the porphyrin conjugate, mobile phase: isocratic (0.05% TFA)/acetonitrile, rate: 1 mL/min.

## DNA Cleavage Assay

Photoirradiation was carried out using a high pressure Xe-arc through a band-path filter (UTVAF–36U, Sigma-Koki, Tokyo, Japan) ( $\lambda = 300\text{--}390\text{ nm}$ , 4 mW, UV–A) or a white LED light source (ISL–150×150–WW, CCS, Kyoto, Japan) ( $\lambda = 400\text{--}800\text{ nm}$ , 2 mW, visible). A gel electrophoresis apparatus (Mupid–exu, Advance, Tokyo, Japan) was used for agarose gel electrophoresis. DNA cleavage studies were performed by the use of supercoiled, covalently closed, circular  $\Phi\text{X174}$  RF I DNA (Form I) (New England Biolabs, USA). Typically, solution of  $\Phi\text{X174}$  RF I DNA (0.5  $\mu\text{g}$ ) and the drugs in 20 mM Tris–HCl buffer (pH 7.2) containing 20 mM NaCl and 2.5 vol% DMSO (total volume 20  $\mu\text{L}$ ) was exposed to UV–A or visible light at ambient temperature. The resultant mixtures were then

analyzed by gel electrophoresis (1% agarose gel, ethidium bromide stain). DNA cleavage was determined by the formation of relaxed circular DNA (Form II) and linear DNA (Form III). The gels were visualized on a UV transilluminator ( $\lambda_{\text{ex}} = 312 \text{ nm}$ , ETX-35.M, Vilber–Lourmat, France).

### Cell Viability Assay

A549, a human epithelial cell line derived from a lung carcinoma (doubling time; 20–24 h), was obtained from American Type Culture Collection. A549 were grown in Dulbecco's modified Eagle medium with high concentrations of glucose (Invitrogen, Carlsbad, CA, USA) containing 10% fetal bovine serum (FBS), 100 U/mL penicillin and 100  $\mu\text{g}$  streptomycin. Cell line was incubated at 37 °C in a humidified atmosphere consisting of 5%  $\text{CO}_2/\text{air}$ . Porphyrins were dissolved in DMSO (final concentration: 0.1% DMSO in culture medium). A549 cells were seeded (5000 cells/well) on a 96 well plates the day before chemicals treatment. After 24 h of incubation in the presence of the porphyrins (0–5  $\mu\text{M}$ ), cells were washed with PBS, and incubated in new PBS for 10 min at 37 °C. Cells were exposed to UV–A or visible light for 10 min, and then PBS was replaced to FBS containing medium. After 48 h incubation in the dark, cell viability was determined by the Cell Counting Kit-8 (Dojin, Kumamoto, Japan) using a spectrophotometer (xMark; Bio-Rad, Hercules, CA, USA).  $\text{IC}_{50}$  values were determined using 4-parameter equations.

### Nuclear Staining

A549 cells were seeded ( $1 \times 10^5$  cells/well) on a 12 well plate the day before chemical treatment. After 24 h of incubation in the presence of the porphyrins (1  $\mu\text{M}$ ), cells were rinsed with PBS and then incubated in new PBS for 10 min. Cells were photoexposed to UV–A or visible light for 10 min, and then PBS was replaced to FBS containing medium. After 24 h incubation in the dark, cells were washed twice with PBS, then stained with Hoechst 33342 (Dojin, Kumamoto, Japan), and imaged by a fluorescence microscope (Keyence BZ–8000, Osaka, Japan).

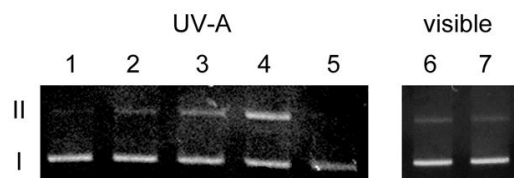

**Figure S1.** Photoinduced DNA cleavage by **11**.  $\Phi$ X174 supercoiled DNA (0.5  $\mu$ g) was incubated with **11** (100  $\mu$ M) in 20  $\mu$ l of Tris–HCl (20 mM, pH 7.2) containing NaCl (20 mM), DMSO (2.5 vol%) at ambient temperature in the dark for 30 min, and then exposed to (lanes 2–4) UV–A or (lanes 6) visible light. Lanes 1 and 7, DNA + **11**; lane 2, DNA + **11** +  $h\nu$  15 min; lane 3, DNA + **11** +  $h\nu$  30 min; lanes 4 and 6, DNA + **11** +  $h\nu$  60 min; lane 5, DNA alone.

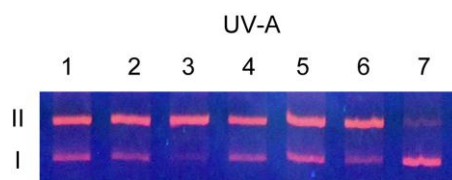

**Figure S2.** Photoinduced DNA cleavage by **11**.  $\Phi$ X174 supercoiled DNA (0.5  $\mu$ g) was incubated with **11** (100  $\mu$ M) in 20  $\mu$ l of Tris–HCl (20 mM, pH 7.2) containing NaCl (20 mM), DMSO (2.5 vol%), and various scavengers at ambient temperature in the dark for 30 min, and UV–A irradiated for 90 min. Lane 1, DNA + **11** +  $h\nu$ ; lane 2, DNA + sodium azide (20 mM) + **11** +  $h\nu$ ; lane 3, DNA + TMP (20 mM) + **11** +  $h\nu$ ; lane 4, DNA + mannitol (20 mM) + **11** +  $h\nu$ ; lane 5, DNA + catalase (100 U/ml) + **11** +  $h\nu$ ; lane 6, DNA + SOD (100 U/ml) + **11** +  $h\nu$ ; lane 7, DNA + **11**.

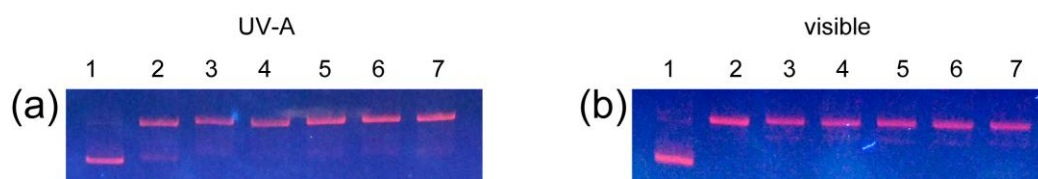

**Figure S3.** Photoinduced DNA cleavage by **12**.  $\Phi$ X174 supercoiled DNA (0.5  $\mu$ g) was incubated with **12** (100  $\mu$ M) in 20  $\mu$ l of Tris–HCl (20 mM, pH 7.2) containing NaCl (20 mM), DMSO (2.5 vol%), and various scavengers at ambient temperature in the dark for 30 min, and exposed to (a) UV–A or (b) visible light for 90 min. Lanes 1, DNA + **12**; lanes 2, DNA + sodium azide (20 mM) + **12** +  $h\nu$ ; lanes 3, DNA + TMP (20 mM) + **12** +  $h\nu$ ; lanes 4, DNA + mannitol (20 mM) + **12** +  $h\nu$ ; lanes 5, DNA + catalase (100 U/ml) + **12** +  $h\nu$ ; lanes 6, DNA + SOD (100 U/ml) + **12** +  $h\nu$ ; lanes 7, DNA + **12** +  $h\nu$ .

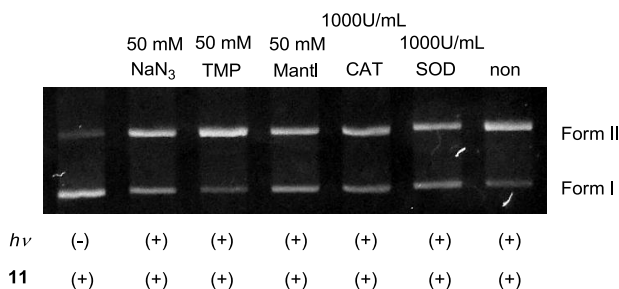

**Figure S4.** The presence of reactive oxygen species was investigated by carrying out the photoinduced DNA cleavage experiments in the presence of singlet oxygen quenchers like NaN<sub>3</sub> (1-20 mM), TMP (1-20 mM), hydroxyl radical scavenger like mannitol (1-20 mM), H<sub>2</sub>O<sub>2</sub> quencher like catalase (10-100 U/mL), and single oxygen quencher like superoxide dismutase (10-100U/mL). Even in the presence of high concentrations of the quenchers (up to 20 mM or 100U/mL) no remarkable quenching effect was observed.

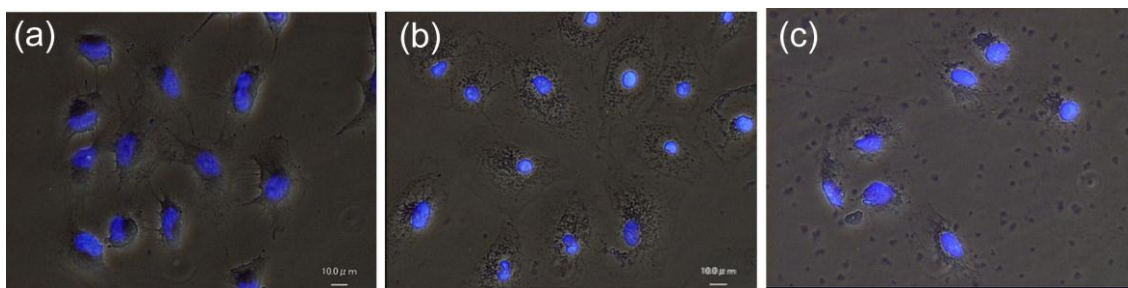

**Figure S5.** Hoechst 33342 staining of TMPyP (1  $\mu$ M) treated A549 cells to identify nuclear morphology: (a) incubated in the dark, (b) exposed to UV-A (4 mW, 10 min), and (c) exposed to visible light (2 mW, 10 min).

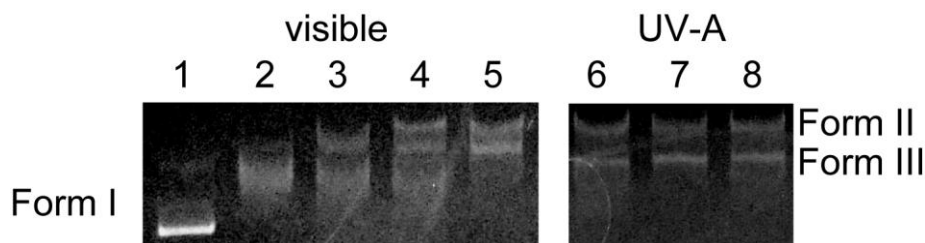

**Figure S6.** Photoinduced DNA cleavage by TMPyP.  $\Phi$ X174 supercoiled DNA (0.5  $\mu$ g) was incubated with TMPyP (20  $\mu$ M) in 20 mL of Tris-HCl (20 mM, pH 7.2) containing NaCl (20 mM) at ambient temperature in the dark for 30 min, and then exposed to (lanes 3-5) visible light or (lanes 6-8) UV-A light. Lane 1, DNA alone; lane 2, DNA+TMPyP; lanes 3 and 6, DNA+TMPyP+ $h\nu$ , 15min; lanes 4 and 7, DNA+TMPyP+ $h\nu$ , 30 min; lanes 5 and 8, DNA+TMPyP+ $h\nu$ , 60 min.

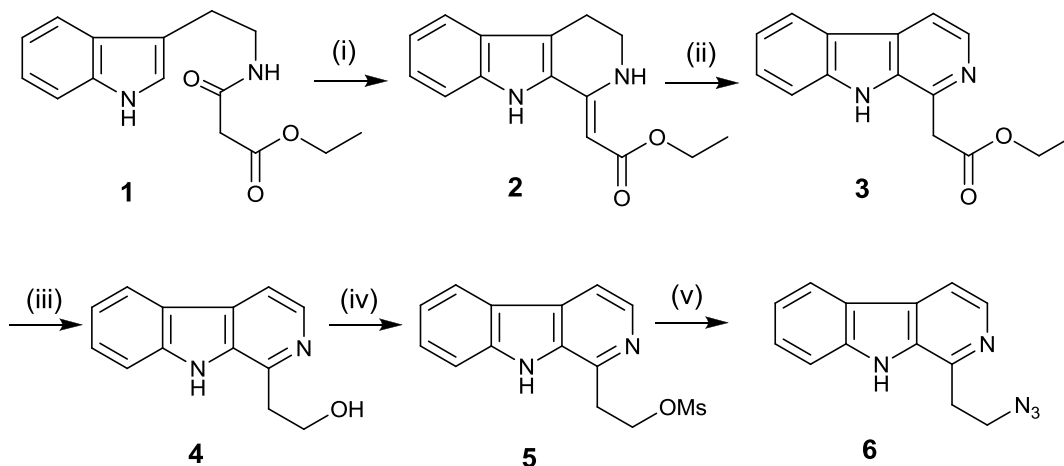

**Scheme S1.** Synthesis of  $\beta$ -carboline azide **6**; (i)  $\text{POCl}_3$ , rt, 8 h, 57%; (ii)  $\text{Pd-C}$  (10%),  $165^\circ\text{C}$ , *p*-cymene, 1 h, 45%; (iii)  $\text{LiAlH}_4$ , THF,  $0-27^\circ\text{C}$ , 6 h, 90%; (iv)  $\text{MsCl}$ ,  $\text{Et}_3\text{N}$ ,  $\text{CH}_2\text{Cl}_2$ ,  $0-5^\circ\text{C}$ , 1 h, 57%; (v)  $\text{NaN}_3$ ,  $\text{DMF-H}_2\text{O}$ ,  $50^\circ\text{C}$ , 8 h, 87%.

***N*-(Indol-3-yl-ethyl)-2-ethoxycarbonylacetamide (1)** To a stirred solution of tryptamine (5 g, 31.25 mmol) at  $0^\circ\text{C}$  was simultaneously added a solution of ethyl malonyl chloride (5.5 g, 36.5 mmol) in dichloromethane (75 mL) and aqueous sodium hydroxide solution (2 g, 75 mL) over a period of 30 minutes with vigorous stirring. The reaction mixture was stirred at room temperature for another 1 h and then diluted with dichloromethane (50 mL) and added HCl (5%, 10 mL). Organic phase was washed with saturated sodium bicarbonate ( $2 \times 10$  mL), dried over sodium sulfate, and concentrated in vacuo to afford a yellow oil which was washed with a mixture of dichloromethane: hexane (1:9) to afford **1** (7.5 g, 88 %). IR (KBr) 3410, 3315, 1735, 1667,  $1559\text{ cm}^{-1}$ .

**1-(Ethoxycarbonylmethylidene)-tetrahydro- $\beta$ -carboline (2)** The amide ester **1** (7.0 g, 25.5 mmol) in phosphorus oxychloride (30 mL) was stirred at room temperature for 7 h. Excess of phosphorus oxychloride was distilled in vacuo and the residue so obtained was basified with saturated sodium bicarbonate and extracted with dichloromethane. After removal of dichloromethane, the resulting crude was washed with a mixture of dichloromethane/hexane to afford **2** as yellow oil (3.7 g, 57 %). IR (KBr) 3348, 1631, 1607,  $1538\text{ cm}^{-1}$ .

**1-(Ethoxycarbonylmethyl)- $\beta$ -carboline: (3)** To a solution of the enaminoester **2** (3.5 g, 13.7 mmol) in *p*-cymene (180 mL) at  $40^\circ\text{C}$  was added 10%  $\text{Pd-C}$  (6.0 g) in one portion and the resulting mixture was immediately kept in a heated oil bath at  $165^\circ\text{C}$  for 15 min. After completion of the reaction, the mixture was diluted with ethyl acetate (100 mL), filtered and distilled off under vacuo. The crude product so obtained was purified by column

chromatography using ethyl acetate:hexane (1:5; v/v) as eluent to afford  $\beta$ -carboline ester **3** (1.6 g, 45 %). IR (KBr) 3507, 1738, 1635  $\text{cm}^{-1}$ .

**1-(2-Hydroxyethyl)- $\beta$ -carboline 4:** To a stirred suspension of lithium aluminium hydride (1.0 g, 3.9 mmol) in tetrahydrofuran (20 mL) was added 20 mL solution of the  $\beta$ -carboline ester **3** (0.84 g, 22.3 mmol) in tetrahydrofuran at room temperature and the resulting mixture was allowed to stir at same temperature for 2 h. The mixture was cooled in an ice-bath, quenched with aqueous sodium hydroxide (1 g, 1 mL) and stirred for another 30 min. Reaction contents were diluted with ethyl acetate (30 mL), dried over anhydrous sodium sulfate, filtered and washed with ethyl acetate. After removal of organic solvent, the crude product obtained was purified by column chromatography using chloroform: methanol (9:1; v/v) to produce alcohol **4** (0.75 g, 90 %). mp 194-196 °C (Lit. m.p. 195.5-197 °C), IR (KBr) 3412, 3177  $\text{cm}^{-1}$ .

**Preparation of  $\beta$ -carboline mesylate 5:** To a stirred and cooled solution of  $\beta$ -carboline alcohol **4** (0.7 g, 3.3 mmol) at 0 °C was added triethylamine (0.53 mL, 3.8 mmol) in dichloromethane (40 mL) followed by methanesulfonyl chloride (0.31 mL, 3.6 mmol). The resulting mixture was stirred at the 0 °C for 20 min. Diluted with dichloromethane (50 mL) and added a saturated solution of sodium bicarbonate. Organic layer was washed with brine (2  $\times$  30 mL), dried over anhydrous sodium sulfate and removed the excess of solvent. The yellow solid so obtained was triturated with a mixture of methanol: diisopropyl ether (6:4, v/v), filtered and dried to afford  $\beta$ -carboline mesylate **5** (0.55 g, 57%). IR (KBr) 3512, 2506, 1633, 1355, 1172  $\text{cm}^{-1}$ .

**Preparation of  $\beta$ -carboline azide 6:** To a solution of mesylate **5** (0.5 g, 1.7 mmol) in DMF (5 mL) was added sodium azide (0.3 g, 5.1 mmol) and stirred at room temperature for 12 h. The reaction mixture was diluted with dichloromethane (80 mL) and water (40 mL) was added. The aqueous layer was extracted with dichloromethane (2  $\times$  20 mL) and combined organic extract was washed with water, dried over sodium sulfate and distilled off. The residue so obtained was purified by chromatography to afford  $\beta$ -carboline azide **6** as lemon yellow solid (0.35 g, 87%). mp: 212–215 °C; IR (KBr) 3517, 2506, 2392, 2098, 1352, 1175  $\text{cm}^{-1}$ ;  $^1\text{H}$  NMR (400 MHz,  $\text{CDCl}_3$ )  $\delta$  8.10 (s, 1H), 7.54 (d,  $J$  = 7.9 Hz, 1H), 7.32 (d,  $J$  = 8.1 Hz, 1H), 7.17 – 7.13 (m, 2H), 7.09 – 7.05 (m, 1H), 6.98 (d,  $J$  = 2.3 Hz, 1H), 3.58 (t,  $J$  = 6.8 Hz, 2H), 2.95 (t,  $J$  = 6.8 Hz, 2H); HRMS-TOF:  $m/z$  calcd. for  $\text{C}_{13}\text{H}_{12}\text{N}_5$  238.1093, found 238.1105  $[\text{M} + \text{H}]^+$ .



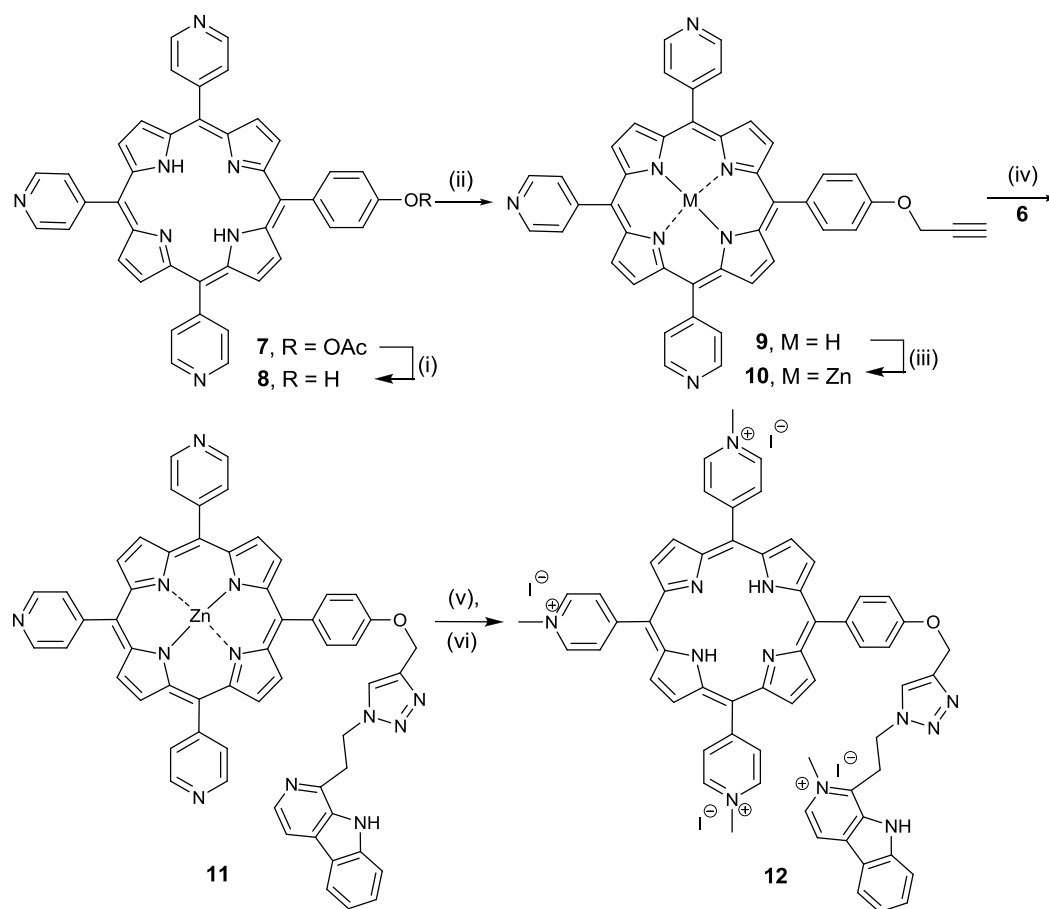

**Scheme S2.** Synthesis of porphyrin- $\beta$ -carboline conjugate **12**; (i) KOH, MeOH-H<sub>2</sub>O, reflux, 5 h; (ii) propargyl bromide (1.2 equiv), K<sub>2</sub>CO<sub>3</sub> (1.2 equiv), DMF, 0–27 °C, 24 h; (iii) Zn(OAc)<sub>2</sub>, CHCl<sub>3</sub>-MeOH, reflux, 2 h; (iv) CuSO<sub>4</sub>, sodium ascorbate, DMF-H<sub>2</sub>O, 80 °C, 7 days; (v) CHCl<sub>3</sub>, aq HCl (25%), 1 h; (vi) MeI (120 equiv.), CHCl<sub>3</sub>, rt, 168 h.

**5-[4'-(Methylcarbonyloxy)]phenyl]-10,15,20-tri(4'-pyridyl)porphyrin 7:** A mixture of 4-carboxyethylbenzaldehyde (4.25 g, 35 mmol), propionic acid (280 mL), and acetic anhydride (16 mL) was heated at 110 °C with stirring. To this solution were successively and slowly added 4-pyridinecarboxaldehyde (10 mL, 113.6 mmol) and pyrrole (9 mL, 135.7 mmol). The resulting mixture was refluxed for 1.5 h. The volume of solvent was reduced to 50 mL at reduced pressure and the mixture was neutralized with a saturated sodium bicarbonate solution, filtered and washed several times with water. The crude material was extracted with a mixture of dichloromethane: methanol (8.5:1.5, v/v) and purified by chromatography using chloroform: methanol (9.5:0.5; v/v) over silica-gel



neutralized with triethylamine prior to loading compound. Evaporation of solvent afforded 0.57 g of **1** as a purple powder in 5% yield. M.p. >300 °C. IR (KBr) carbonyl at 1740 cm<sup>-1</sup>.

**5-(4'-Hydroxyphenyl)-10,15,20-tri(4'-pyridyl)porphyrin 8:** Porphyrin **7** (0.6 g, 0.89 mmol) was dissolved in 25 mL of ethanol and 45 mL of 2M NaOH solution. The resulting mixture was refluxed for 1 h, cooled to room temperature and 90 mL of 1N HCl was added. The resulting solution (pH = 7) was then extracted with chloroform (4 × 80 mL). After removal of chloroform, obtained pure product **8** in 85% yield (0.49 g) which was used as such without further purification.

**5-(4'-Propargyloxyphenyl)-10,15,20-tri(4'-pyridyl)porphyrin 9:** To a stirred suspension of **8** (0.3 g, 0.47 mmol) and fused potassium carbonate (0.078 g, 0.57 mmol) at 0 °C in dry DMF (20 mL) was gradually added propargyl bromide (0.064 g, 0.057 mmol) over a period of 15 min. The reaction mixture was allowed to stir at room temperature for 24 h. After completion of the reaction, mixture was cooled to room temperature, diluted with DCM (50 mL), filtered. To the filtrate, 70 mL of water was added and separated organic phase, dried over anhydrous sodium sulfate and concentrated in vacuo. Chromatography (9:1, chloroform: methanol) of the residual mass afforded **9** as purple solid (0.17 g, 55%). M.p. >300 °C; IR (KBr) 3210, 2967, 2945, 2875, 2110 cm<sup>-1</sup>; <sup>1</sup>H NMR (400 MHz, DMSO-*d*<sub>6</sub>) δ 9.00–8.98 (m, 6H), 8.88–8.81 (m, 8H), 8.27–8.26 (m, 6H), 8.17 (d, *J* = 8.0 Hz, 2H), 7.45 (d, *J* = 8.0 Hz, 2H), 5.10 (s, 2H), 2.88 (s, 1H), -3.02 (s, 2H); ESI-MS: *m/z* calcd for C<sub>44</sub>H<sub>29</sub>N<sub>7</sub>O 672.24, found 672.30 [M+H]<sup>+</sup>.

**5-(4'-Propargyloxyphenyl)-10,15,20-tri(4'-pyridyl)porphyrinato zinc(II) 10:** To a stirred solution of **9** (0.15 g, 0.22 mmol) in a mixture chloroform: methanol (3:1, 15 mL) was added Zn(OAc)<sub>2</sub> (0.051 g, 0.23 mmol) and the contents were refluxed for 1 h. After completion of the reaction, the reaction mixture was diluted with chloroform (30 mL) and saturated sodium bicarbonate (50 mL) (pH = 8). The organic layer was separated, washed with water and dried over Na<sub>2</sub>SO<sub>4</sub>. The excess of the solvent was distilled off in vacuum to produce **10** (0.15 g, 90%) as purple solid. The compound was sufficiently pure and used for next step without further purification.

**Preparation of porphyrin-β-carboline conjugate 11:** To a stirred solution of metallated porphyrin **10** (0.15 g, 0.2 mmol) in DMF: H<sub>2</sub>O (1:1; 40 mL) was added CuSO<sub>4</sub>·5H<sub>2</sub>O (0.19

g, 0.8 mmol), sodium ascorbate (0.32 g, 1.6 mmol) followed by  $\beta$ -carboline azide **6** (0.097 g, 0.41 mmol). The reaction mixture was heated at 80 °C and stirred for 168 h. After completion of the reaction, the contents were diluted with chloroform (50 mL) and ammonia solution (20%, 15 mL). The resulting solution was filtered over thin celite bed and washed thoroughly with chloroform. The combined organic phase was washed with water, dried over anhydrous sodium sulfate and distilled off under vacuo. The residue so obtained was purified by column chromatography using chloroform: methanol (8:2, v/v) as eluent to afford the porphyrin conjugate **11** (0.115 g, 57%) as dark green solid. M.p. >300 °C;  $^1\text{H}$  NMR (400 MHz, DMSO- $d_6$ )  $\delta$  12.02 (s, 1H), 8.86–8.82 (m, 7H), 8.36 (d,  $J$  = 5.6 Hz, 1H), 8.23 (s, 1H), 8.19–8.07 (m, 9H), 7.76–7.74 (m, 8H), 7.65–7.59 (m, 2H), 7.34–7.27 (m, 3H), 5.39 (s, 2H), 5.14 (t,  $J$  = 7.3 Hz, 2H), 4.00 (t,  $J$  = 7.3 Hz, 2H); HRMS-TOF:  $m/z$  calcd for  $\text{C}_{57}\text{H}_{39}\text{N}_{12}\text{OZn}$  971.2583; found 971.2541  $[\text{M} + \text{H}]^+$ .

**Preparation of cationic porphyrin- $\beta$ -carboline conjugate 12:** To a stirred solution of metallated conjugate **11** (0.1 g) in chloroform: methanol (19:1, 25 mL) was added hydrochloric acid (25%, 10 mL) and stirred for 1 h. Cooled the reaction mixture, basified with ammonia solution and separated the organic layer, which was dried over anhydrous sodium sulfate and distilled off under vacuo to afford demetallated porphyrin triazole **11a** (0.088 g), which was dissolved in dichloromethane: methanol (9:1), precipitated by adding hexane, filtered, dried and used as such for further reaction.  $^1\text{H}$  NMR (500 MHz, DMSO- $d_6$ )  $\delta$  11.83 (s, 1H), 9.03–9.02 (m, 6H), 8.99 – 8.82 (m, 8H), 8.37 – 8.33 (m, 2H), 8.23 – 8.22 (m, 7H), 8.09 – 8.05 (m, 3H), 7.62 (d,  $J$  = 8.2 Hz, 1H), 7.53 (t,  $J$  = 7.4 Hz, 1H), 7.44 (d,  $J$  = 8.2 Hz, 2H), 7.21 (t,  $J$  = 7.3 Hz, 1H), 5.40 (s, 2H), 5.08 (t,  $J$  = 7.4 Hz, 2H), 3.85 (t,  $J$  = 7.2 Hz, 2H), –3.01 (s, 2H); MALDI-TOF:  $m/z$  calcd for  $\text{C}_{57}\text{H}_{41}\text{N}_{12}\text{O}$  909.3526; found: 909.3558  $[\text{M} + \text{H}]^+$ . To a solution of demetallated porphyrin triazole (0.088 g, 0.098 mmol) in dry N,N'-dimethylformamide (20 mL) was added methyl iodide (0.75 mL, 11.73 mmol) and allowed the reaction mixture to stir at room temperature until starting material was consumed (72 h). The solvent was removed in vacuo and methanol (5 mL) was added. The solution was precipitated by adding diethyl ether (15 mL), which was repeated four times to afford compound **12** (0.08 g, 62%) as brown solid. M.p. >300 °C  $^1\text{H}$  NMR (DMSO- $d_6$ , 500 MHz)  $\delta$  9.49 – 9.42 (m, 8H), 9.18 – 8.99 (m, 15H), 8.23 – 8.15 (m, 4H), 7.77 (s, 1H), 7.64 (d,  $J$  = 8.2 Hz, 2H), 7.16 – 7.14 (m, 1H), 5.88 (s, 2H), 5.27 (t,  $J$  = 7.2 Hz, 2H), 4.95 (t,  $J$  = 7.3 Hz, 2H) 4.73 (s, 9H), 4.60 (s, 3H), –3.01 (s, 2H);  $^{13}\text{C}$  NMR (126 MHz, DMSO- $d_6$ )  $\delta$  157.92, 157.08, 156.89, 148.68, 147.96, 145.84, 144.64, 144.64, 143.54,

139.94, 136.11, 134.46, 132.58, 131.42, 130.21, 126.21, 122.88, 116.92, 115.93, 115.78, 114.78, 114.21, 107.79, 71.56, 58.93, 48.37, 46.47, 31.22; MALDI-TOF: calcd for  $C_{61}H_{52}N_{12}O$ : 968.4365; found: 968.4357  $[M]^+$ ; HPLC purity: 99.24%.

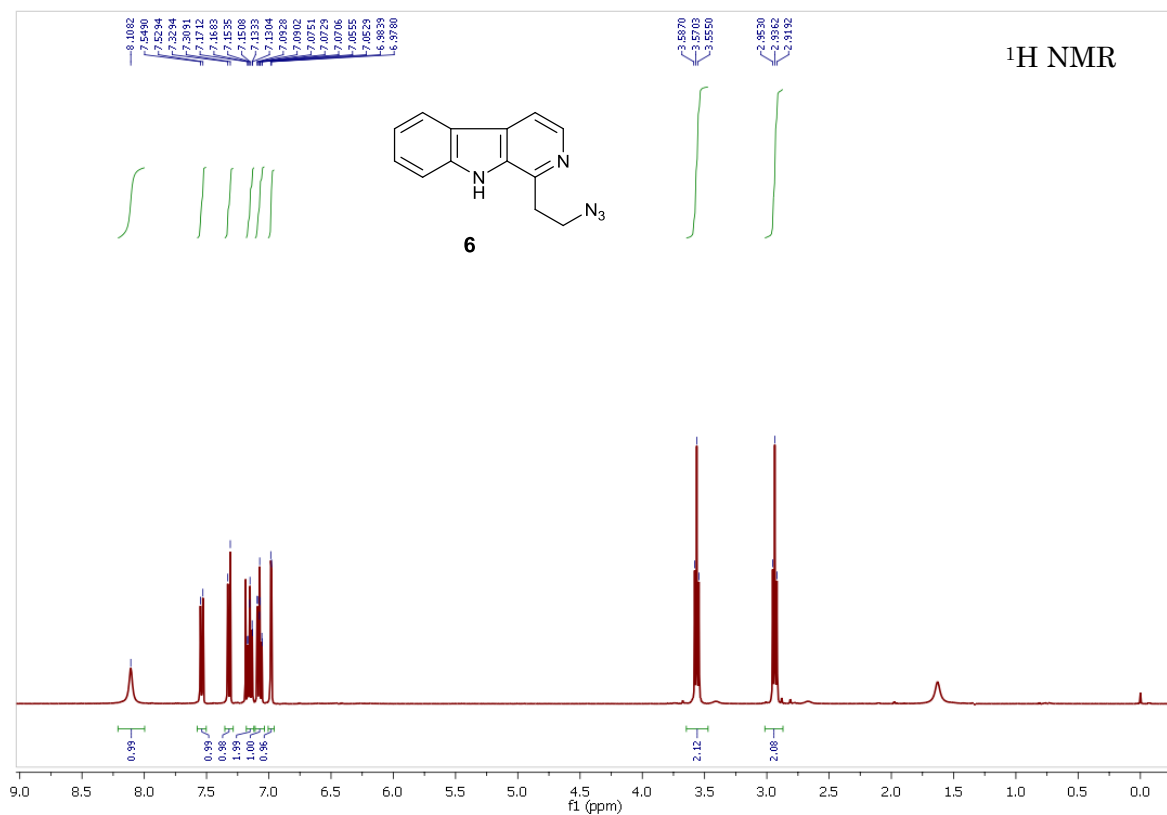

Applied Biosystems MDS Analytical Technologies TOF/TOF™ Series Explorer™ 72027

HRMS

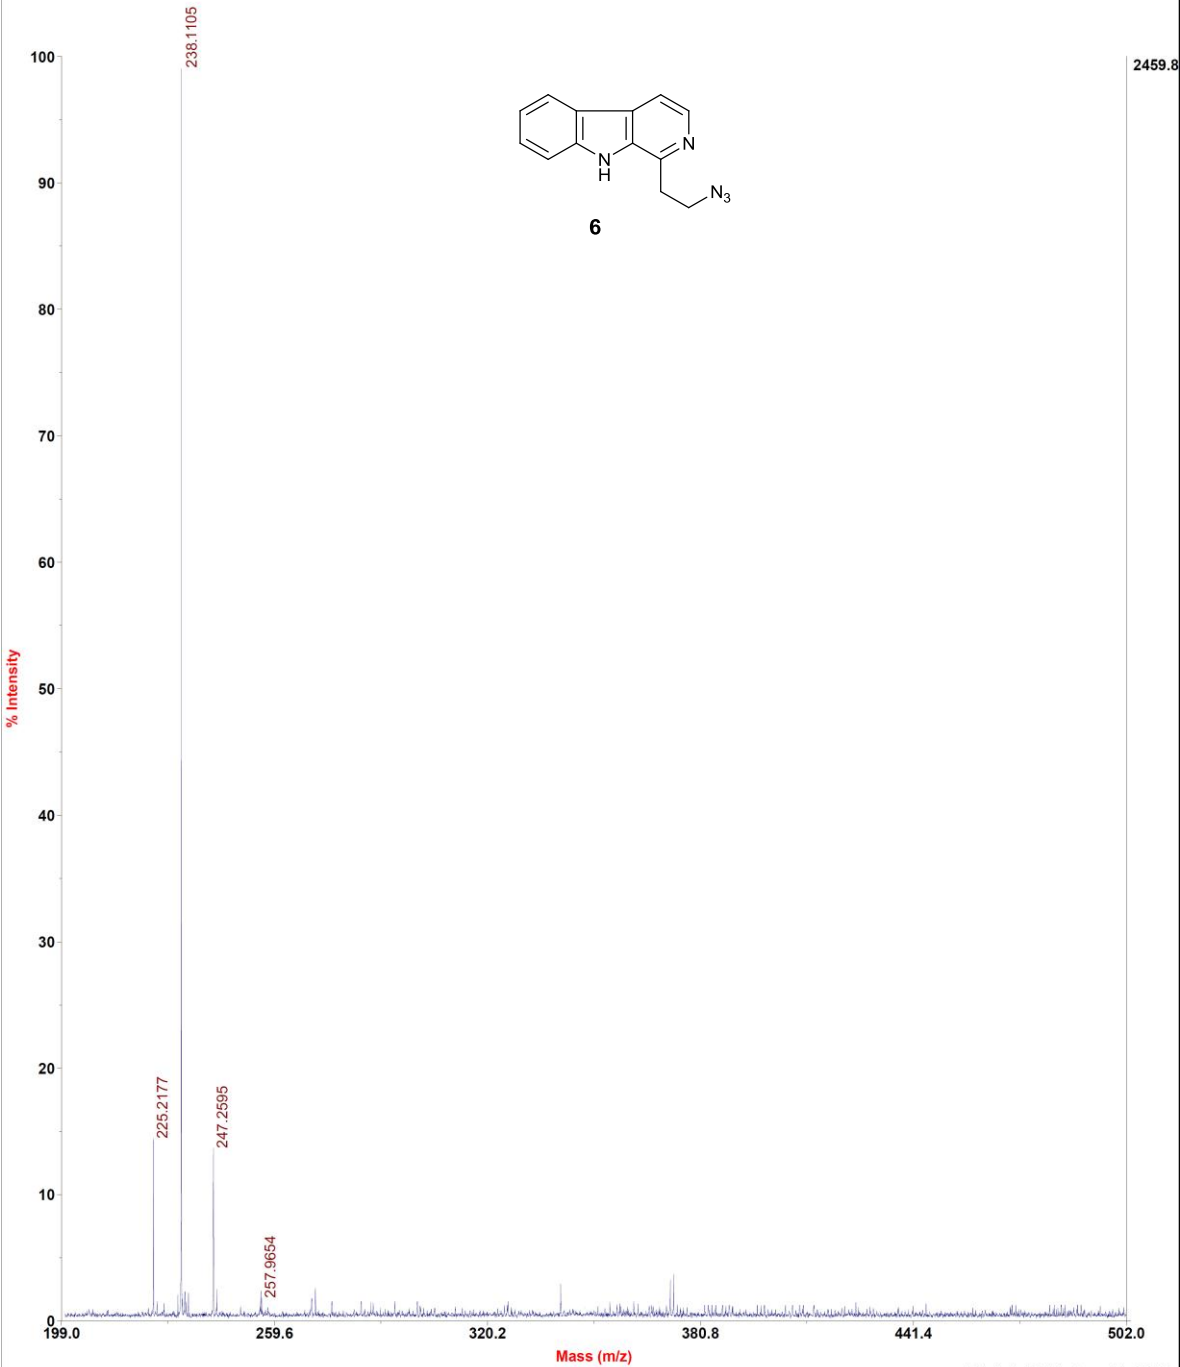

C:\Applied Biosystems MDS Analytical Technologies\TOFTOF Data\ExportT2D\AIRF-MASS\2805112J1\_MS.t2d

Printed: 12:44, June 11, 2012

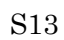

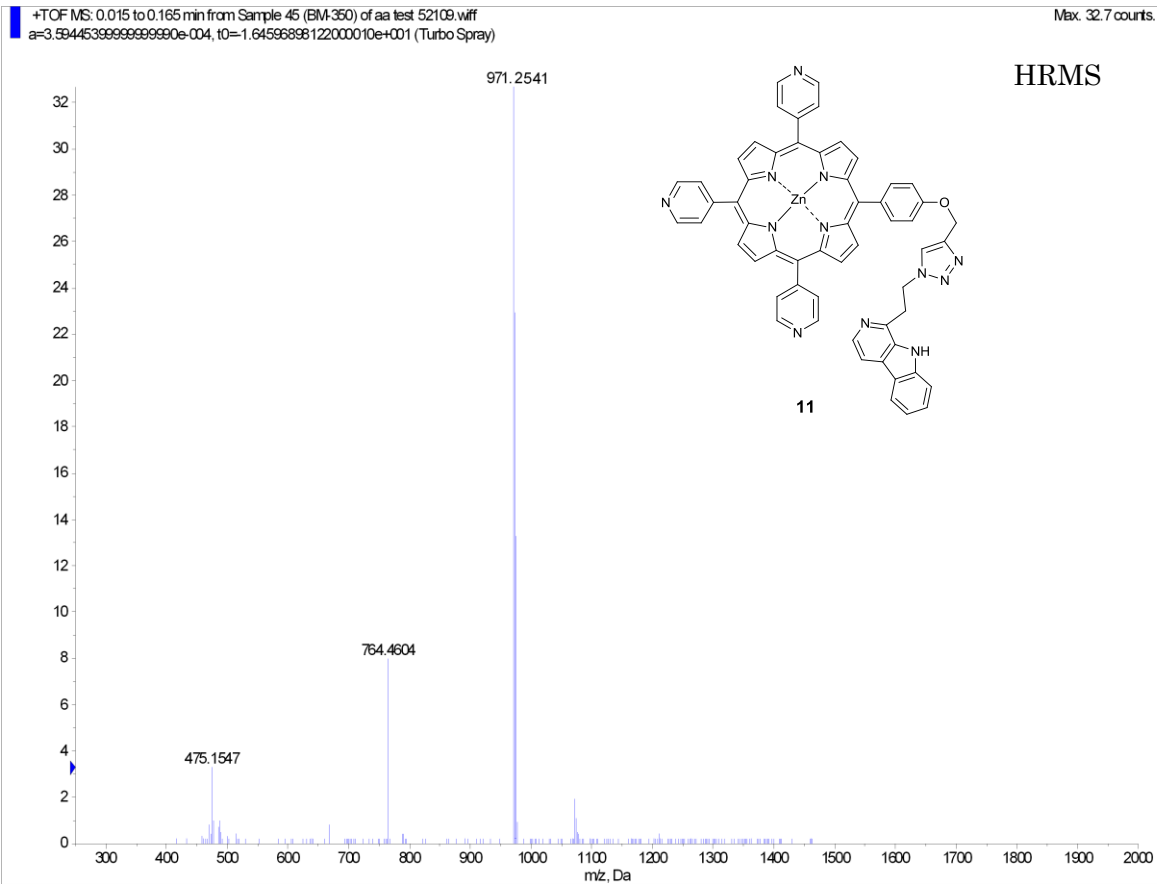

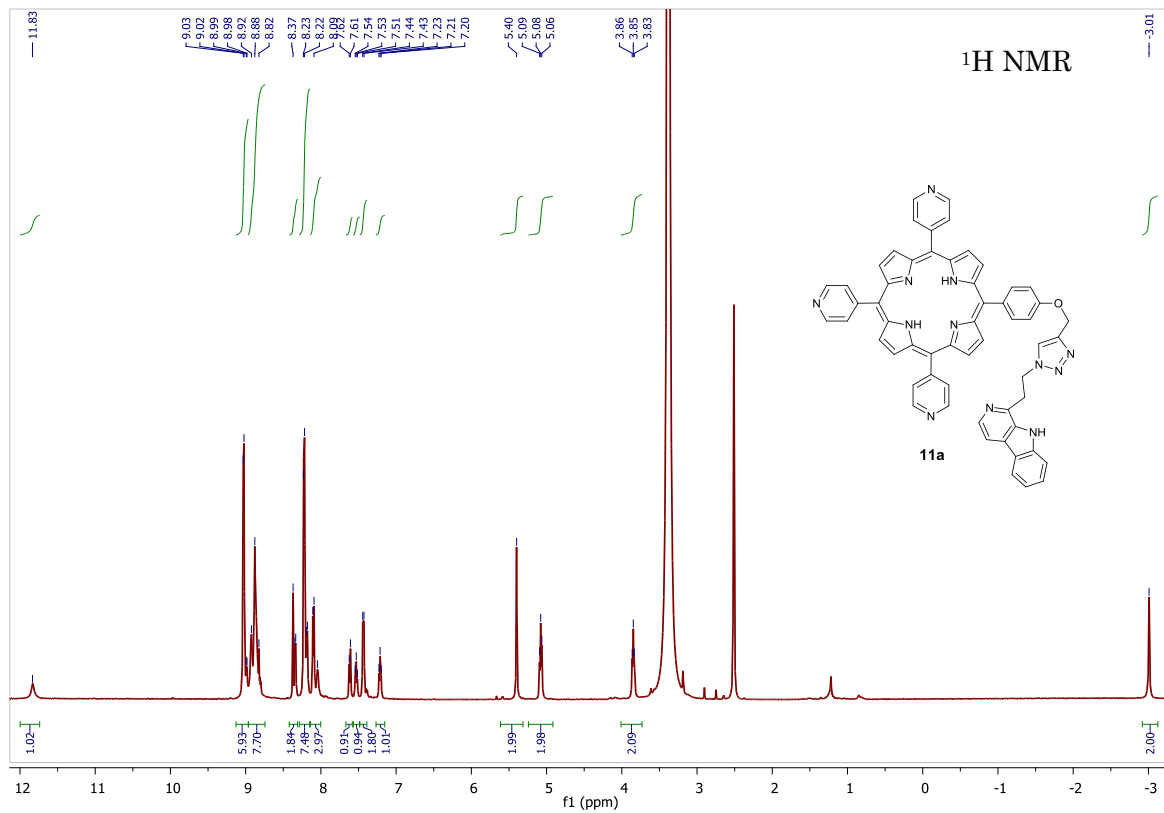



Applied Biosystems MDS Analytical Technologies TOF/TOF™ Series Explorer™ 72027

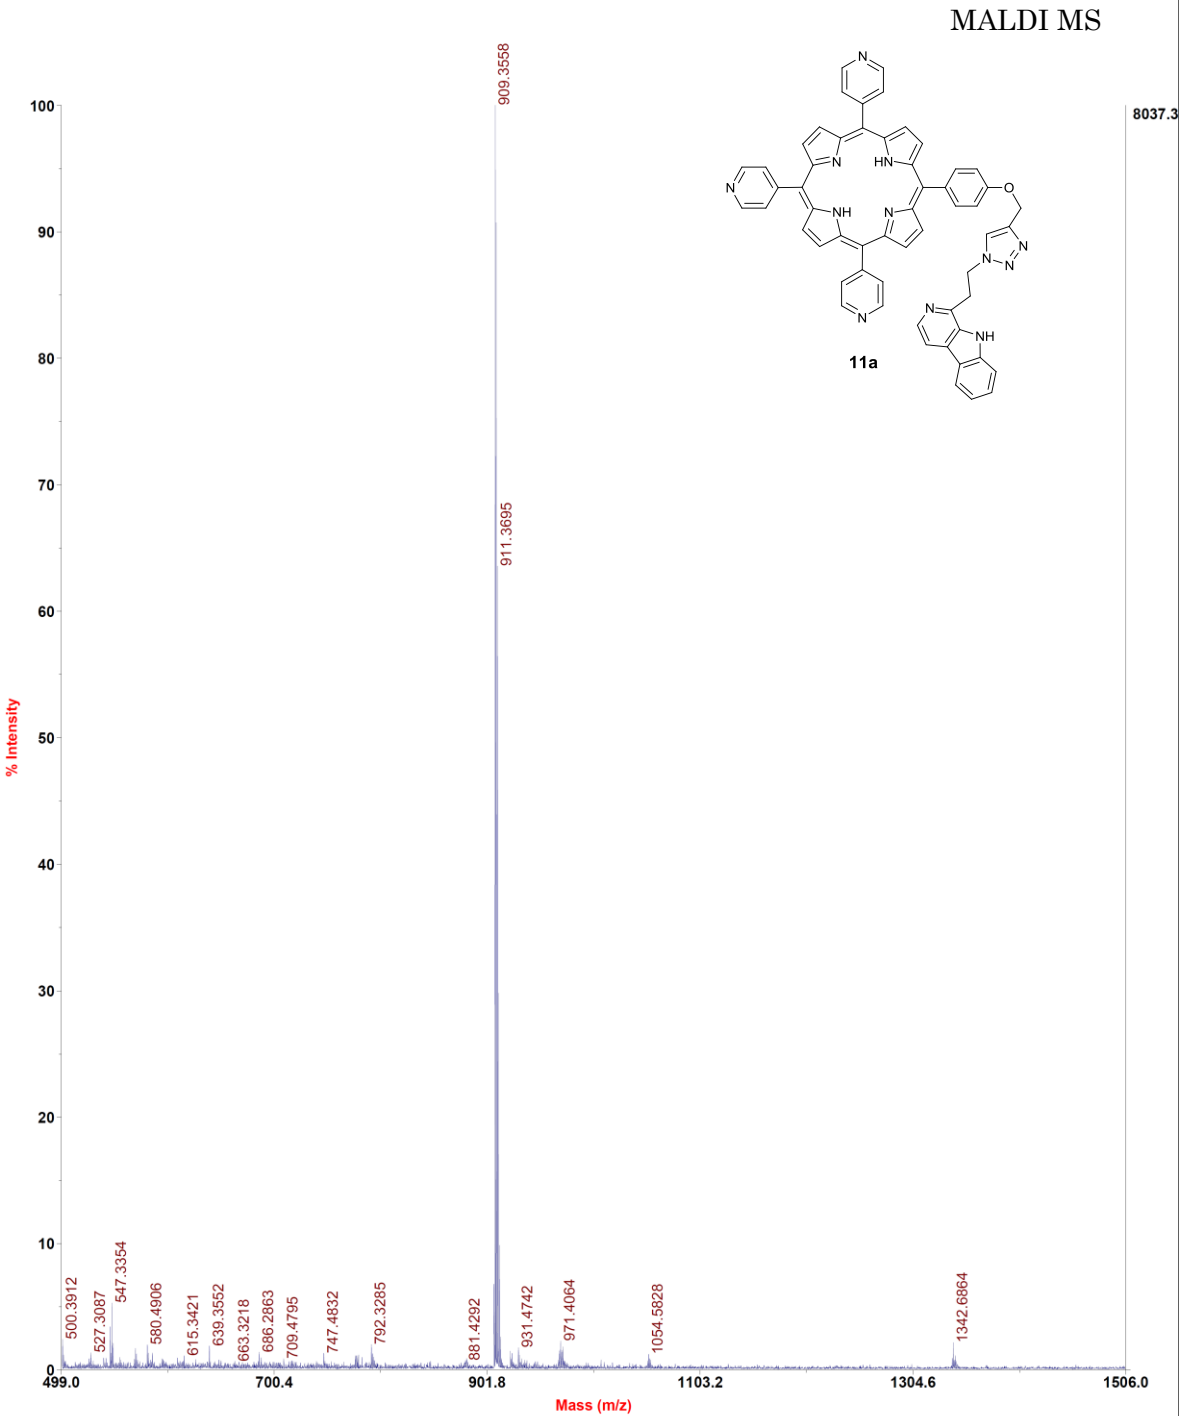

Printed: 16:17, December 20, 2011  
C:\Applied Biosystems MDS Analytical Technologies\TOFTOF Data\ExportT2D\AIRF-MASS\19-12-11\P2\_MS.t2d

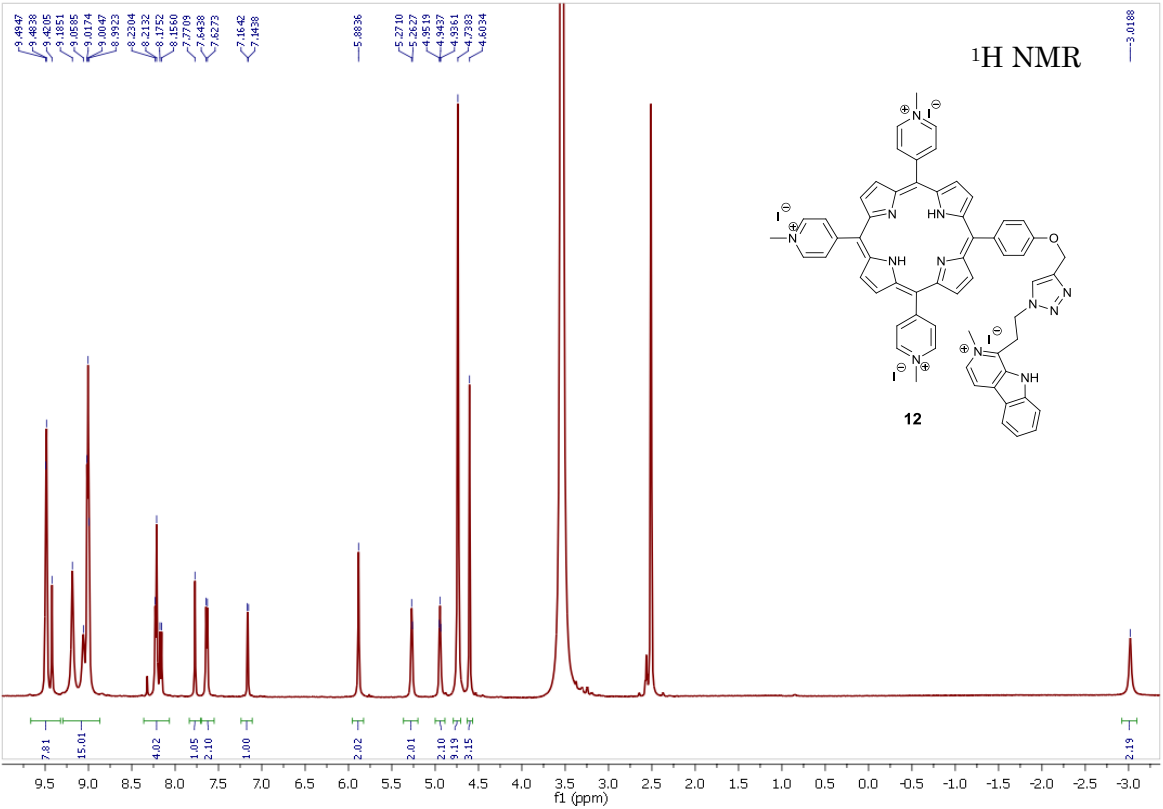

Applied Biosystems MDS Analytical Technologies TOF/TOF™ Series Explorer™ 72027

MALDI MS

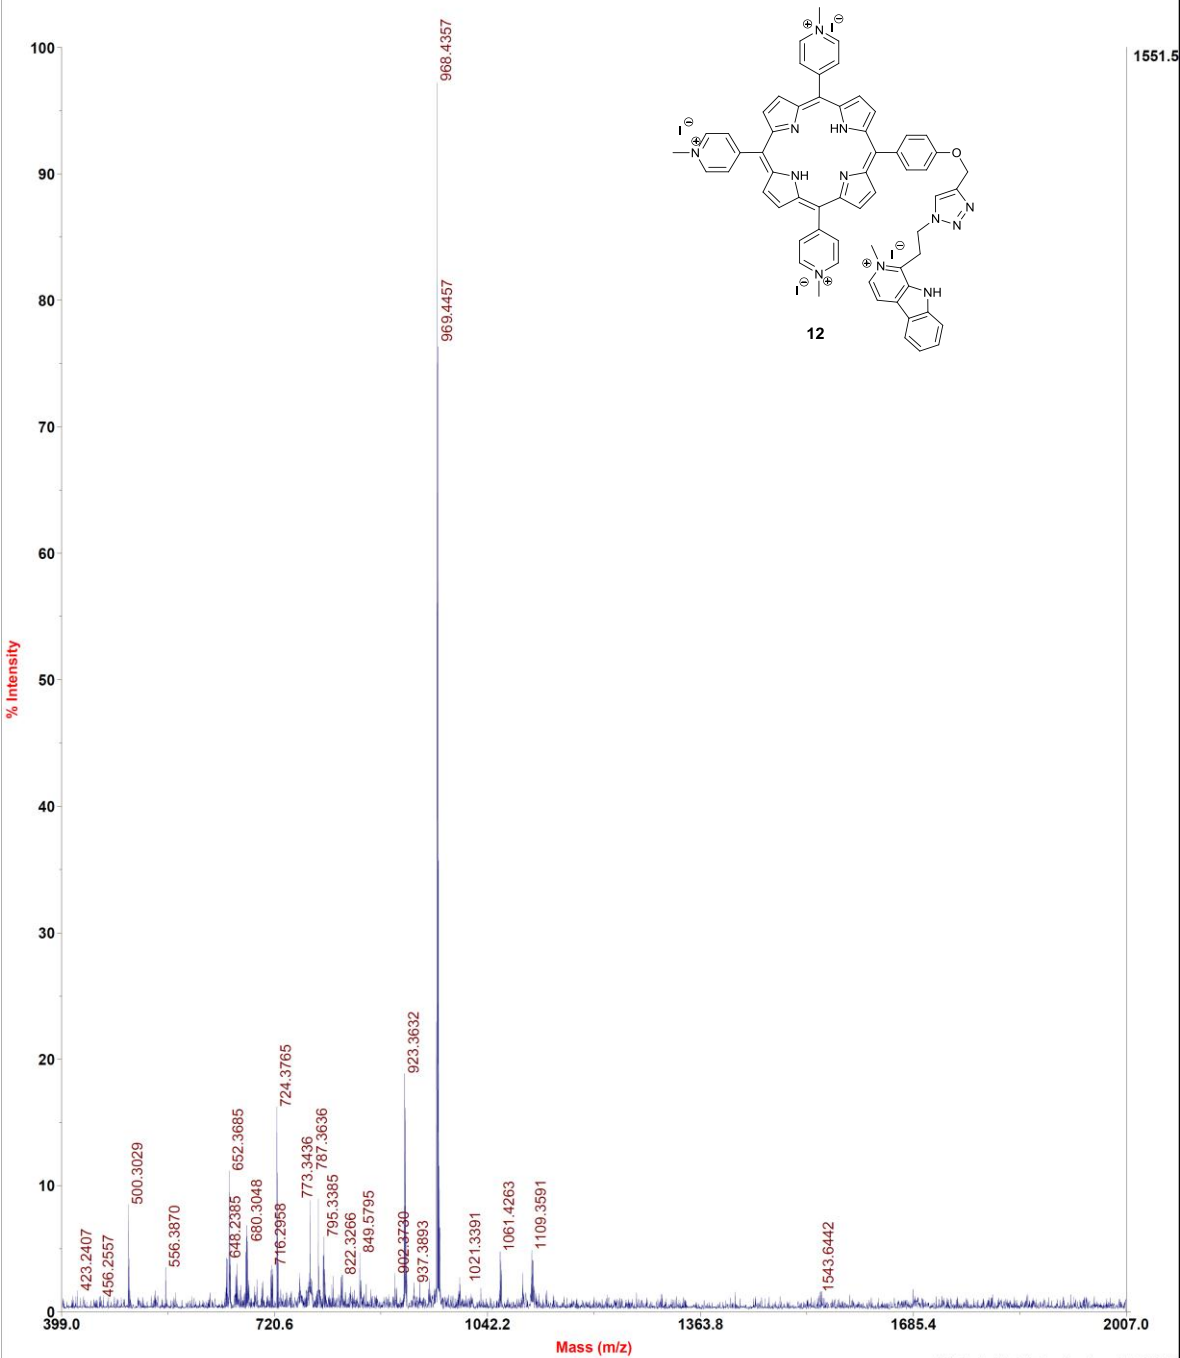

C:\Applied Biosystems MDS Analytical Technologies\TOFTOF Data\ExportT2D\AIRF-MASS\290812\I5\_MS.t2d

Printed: 14:14, September 07, 2012

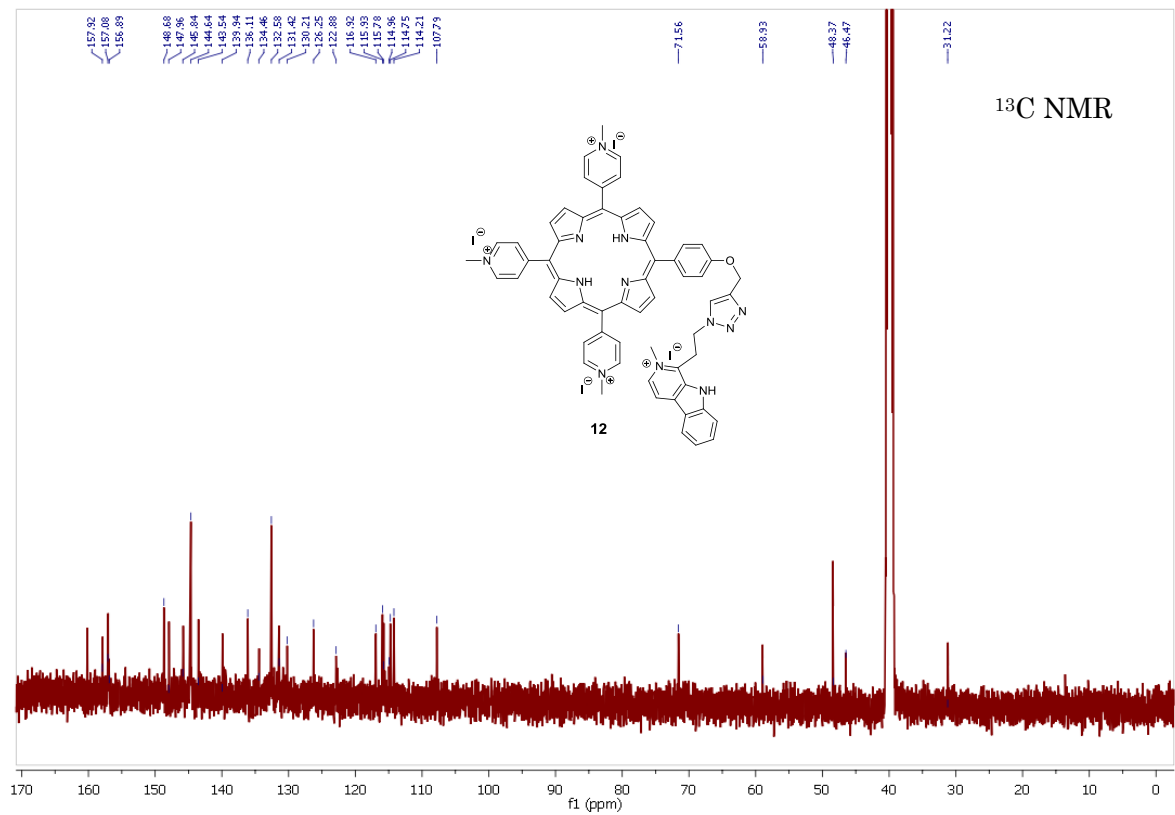

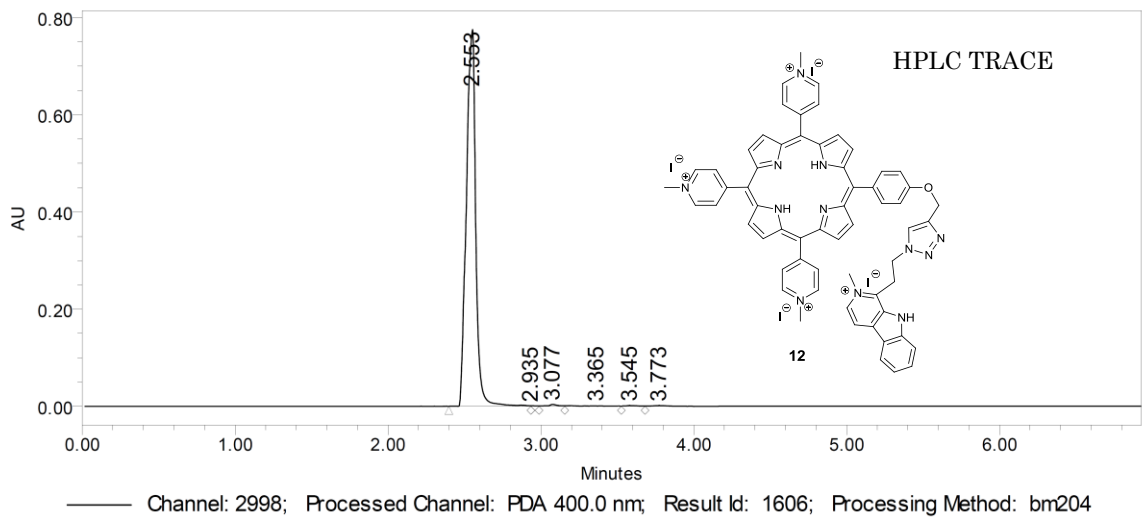

**Processed Channel Descr.: PDA 400.0  
nm**

|   | Processed<br>Channel Descr. | RT    | Area    | % Area | Height |
|---|-----------------------------|-------|---------|--------|--------|
| 1 | PDA 400.0 nm                | 2.553 | 3303471 | 99.24  | 775786 |
| 2 | PDA 400.0 nm                | 2.935 | 3132    | 0.09   | 1132   |
| 3 | PDA 400.0 nm                | 3.077 | 17513   | 0.50   | 3765   |
| 4 | PDA 400.0 nm                | 3.365 | 2584    | 0.08   | 1001   |
| 5 | PDA 400.0 nm                | 3.545 | 1758    | 0.05   | 654    |
| 6 | PDA 400.0 nm                | 3.773 | 1406    | 0.04   | 513    |
